# Supplementary material for: Shewanella putrefaciens, a rare human pathogen: A review from a clinical perspective
Source: PubMed Central journal article supplement (PMC9933709; doi:10.3389/fcimb.2022.1033639), 2023-02-02
Supplement: Table_1.pdf [file Table_1.pdf]

| Case No.                               | Reference                | Age (Years)/ Sex | Risk facts                            | Comorbidities                                                                                                                                                                                    | Clinical presentation             | Source/ Identification                                                                                                           | Potential entry port      | Poly- (P)/ Monomicrobial (M) | Bacteremia   | Antibiotic treatment | Outcome              |
|----------------------------------------|--------------------------|------------------|---------------------------------------|--------------------------------------------------------------------------------------------------------------------------------------------------------------------------------------------------|-----------------------------------|----------------------------------------------------------------------------------------------------------------------------------|---------------------------|------------------------------|--------------|----------------------|----------------------|
| <b>Skin and Soft-tissue infections</b> |                          |                  |                                       |                                                                                                                                                                                                  |                                   |                                                                                                                                  |                           |                              |              |                      |                      |
| 1.                                     | Bulut et al., 2004       | 27/M             | Sea water exposure                    | -                                                                                                                                                                                                | Cellulitis of the scalp           | Fine needle aspiration from the left parietal scalp/ Biochemical reactions and API ID 32 GN (BioMerieux, Marcy-l'Etoile, France) | Head trauma under the sea | M                            | Not reported | Cefa; Cipro          | Clinical improvement |
| 2.                                     | Papanaoum et al., 1998   | 67/M             | Sea water exposure, immunosuppression | Systemic lupus erythematosus; asthma, multiple squamous cell carcinomas of the skin, amputated toe due to osteomyelitis, contained granulomas with acid-fast bacilli on the left arm 2 years ago | Severe cellulitis on the left leg | Swab of the leg ulcers/ API 20NE system (bio Mérieux sa, Lyon, France)                                                           | Leg ulcers                | M                            | No           | Peni + Genta; Cipro  | Clinical improvement |
| 3.                                     | Sharma and Kalawat, 2010 | 57/F             | Malignancy, HBD                       | Breast carcinoma, hepatitis B                                                                                                                                                                    | Infected ulcer                    | Not reported/ Biochemical reactions                                                                                              | Chest wall ulcer          | M                            | Not reported | None                 | Recovered            |
| 4.                                     | Sharma and Kalawat, 2010 | 35/F             | -                                     | -                                                                                                                                                                                                | Infected burns                    | Not reported/ Biochemical reactions                                                                                              | Right leg burns           | M                            | Not reported | None                 | Recovered            |

|     |                     |      |                              |                                                                                                       |                                                                       |                                                                                                       |                                                           |   |              |                               |                                                       |
|-----|---------------------|------|------------------------------|-------------------------------------------------------------------------------------------------------|-----------------------------------------------------------------------|-------------------------------------------------------------------------------------------------------|-----------------------------------------------------------|---|--------------|-------------------------------|-------------------------------------------------------|
| 5.  | Prinja et al., 2013 | 92/M | Sea water exposure           | DM                                                                                                    | Cellulitis and wound infection                                        | Wound swabs/ Not reported                                                                             | Open fracture of the calcaneum/ ankle after boat accident | M | Not reported | Amoclav; Peni + Fluclo; Cipro | Recovered                                             |
| 6.  | Yohe et al., 1997   | 61/M | Place of residence, PAVD     | COPD, PAVD, vascular insufficiency of the lower legs                                                  | Abscess of the foot                                                   | Abscess drainage/ Biochemical reactions and VITEK System (bioMérieux Vitek, Inc., Hazelwood, Mo.)     | Not reported                                              | P | No           | Ceftr + Clinda; TMP/SMX       | Recovered                                             |
| 7.  | Otsuka et al., 2007 | 67/M | HBD, consumption of raw fish | primary sclerosing cholangitis with decompensated liver cirrhosis, distal GE for early gastric cancer | Cellulitis and septicemia                                             | Blood cultures/ Automated and semiautomated analyzers (VITEK2 and API 20NE; BioMerieux, Tokyo, Japan) | Not reported                                              | M | Yes          | Imi; Cipro                    | Died (MOF)                                            |
| 8.  | Chen et al., 1997   | 73/M | HBD                          | Alcoholism, fatty liver                                                                               | Spontaneous periorbitofacial cellulitis with sepsis                   | Blood culture, facial tissue/ ID 32 GN profile (API system; bioMérieux, Marcy l'Etoile, France)       | Not reported                                              | M | Yes          | Ctax + Clinda + Genta         | Died                                                  |
| 9.  | Chen et al., 1997   | 53/M | Malignancy, cachexia         | Terminal rectal carcinoma with intraabdominal carcinomatosis                                          | Perineal abscess with numerous peritoneocutaneous fistulas            | Pus/ ID 32 GN profile (API system; bioMérieux, Marcy l'Etoile, France)                                | Not reported                                              | M | No           | Cefa + Genta                  | Died because of cachexia due to underlying malignancy |
| 10. | Chen et al., 1997   | 69/M | HBD                          | Cholelithiasis, chronic cholezystitis                                                                 | Cellulitis, postcholecystectomy wound infection, subcutaneous abscess | Pus/ ID 32 GN profile (API system; bioMérieux, Marcy l'Etoile, France)                                | Not reported                                              | P | Not reported | Cefa + Genta; Clex            | Recovered                                             |

|     |                     |      |                                    |                                                                                                                                                         |                                           |                                                                        |                                                                 |   |              |                                                                          |                                           |
|-----|---------------------|------|------------------------------------|---------------------------------------------------------------------------------------------------------------------------------------------------------|-------------------------------------------|------------------------------------------------------------------------|-----------------------------------------------------------------|---|--------------|--------------------------------------------------------------------------|-------------------------------------------|
| 11. | Chen et al., 1997   | 53/F | Immuno-suppression                 | Aplastic anaemia                                                                                                                                        | Finger cellulitis                         | Pus/ ID 32 GN profile (API system; bioMérieux, Marcy l'Etoile, France) | Fish punctured wound                                            | P | Not reported | Cefa + Genta; Pip + Genta + Vanco                                        | Recovered                                 |
| 12. | Ryan et al., 2018   | 40/F | Exposure to saltwater flora        | -                                                                                                                                                       | Soft tissue infection of the left palm    | Culture from the wound/ Not reported                                   | Hand laceration, retained seashell fragments                    | M | No           | Pip/Taz + Vanco + Cipro; Cipro + Doxy                                    | Recovered                                 |
| 13. | Giroux et al., 2017 | 67/M | Fishing, DM                        | DM                                                                                                                                                      | Necrotizing fasciitis of the lower limb   | Blood cultures, tissue/ Bruker MALDI-TOF Mass Spectrometry             | Not reported                                                    | P | Yes          | Amoclav; Pip/Taz + Clinda + Amika; Pip/Taz + Clinda; Ctax + Line + Metro | Recovered                                 |
| 14. | Tang et al., 2016   | 65/M | Renal disease, DM                  | Hypertension, DM, hyperlipidemia, nephrotic syndrome, chronic renal impairment, congestive heart failure                                                | Fournier's gangrene with sepsis, DIC, ACS | Scotal fluid/ Vitek 2, subsequent MALDI-TOF                            | Not reported                                                    | P | No           | Amoclav; Ceftriaxone                                                     | Died                                      |
| 15. | Patel et al., 2020  | 38/M | Fish tank and puffer fish exposure | Prior left thumb dislocation, bilateral carpal tunnel releases, traumatic brain injury, depression, anxiety, migraines, fibromyalgia, arthritis, smoker | Flexor tenosynovitis                      | Distal tendon sheath cultures/ Not reported                            | Penetrating injury via new, clean drill bit with further trauma | P | No           | Vanco + Pip/Taz; TMP/SMX + Cipro; TMP/SMX                                | Recovered, still limited due to stiffness |

|                                    |                        |                  |                                        |                                                                         |                                                                                                |                                                                                                                         |                                         |   |                             |                    |                                                             |
|------------------------------------|------------------------|------------------|----------------------------------------|-------------------------------------------------------------------------|------------------------------------------------------------------------------------------------|-------------------------------------------------------------------------------------------------------------------------|-----------------------------------------|---|-----------------------------|--------------------|-------------------------------------------------------------|
| 16.                                | Mohr et al., 2016      | 53/M             | Immuno-suppression, ESRD, DM           | ESRD, DM, heart-Tx, pacemaker, CMV colitis                              | Soft tissue infection of the left foot                                                         | Wound swab, tissue biopsies/ Not reported                                                                               | Foot ulcer                              | P | No                          | Mero + Vanco       | Recovered                                                   |
| 17.                                | Latif et al., 2019     | 70/M             | HBD                                    | CAD, alcoholic liver cirrhosis with TIPSS                               | Sepsis secondary to cellulitis                                                                 | Blood cultures/ VITEK (bioMérieux)                                                                                      | Chronic stasis dermatitis               | M | Yes                         | Vanco + Mero; Levo | Recovered                                                   |
| 18.                                | Pagani et al., 2003    | 87/M             | Immuno-suppression, sea water exposure | Rheumatic myalgia with long-term, low-dose methyl-prednisolone, obesity | Erysipelas of the left forearm and pneumonic infiltrates                                       | Blood cultures/ VITEK II automated system (bioMérieux, Marcy l'Etoile, France), semiautomated Api ID 32 GN (bioMérieux) | Cutaneous-subcutaneous wound left elbow | M | Yes                         | Ampi/Sulb; Ampi    | Recovered                                                   |
| 19.                                | Brink et al., 1995     | 36/ Not reported | Poor living standards                  | Not reported                                                            | Cellulitis                                                                                     | Blood cultures/ Biochemical reactions and API 20NE system (bioMérieux, Marcy l'Etoile, France)                          | Traumatic ulcer on lower extremity      | P | Yes                         | Not reported       | Recovered                                                   |
| <b>Arthritis and osteomyelitis</b> |                        |                  |                                        |                                                                         |                                                                                                |                                                                                                                         |                                         |   |                             |                    |                                                             |
| 20.                                | Levy and Tessier, 1998 | 48/M             | Sea water exposure                     | -                                                                       | Arthritis (proximal interphalangeal articulation of the left foot) with cellulitis and fistula | Articular fluid, periarticular tissue/ API 20NE System (bioMérieux, Marcy-l'Etoile, France)                             | Puncture from sea urchins needle        | M | No blood cultures performed | Cipro; Ceftr       | Persistent edema and fistula 2 weeks after end of treatment |

|                                            |                             |      |                                                        |                                                                                        |                                                                           |                                                                              |                                                     |   |              |                                                     |                                                 |
|--------------------------------------------|-----------------------------|------|--------------------------------------------------------|----------------------------------------------------------------------------------------|---------------------------------------------------------------------------|------------------------------------------------------------------------------|-----------------------------------------------------|---|--------------|-----------------------------------------------------|-------------------------------------------------|
| 21.                                        | Carlson and Dux, 2013       | 77/M | PAVD, chronic lower extremity ulceration, poor hygiene | Pancytopenia, PAVD, hypertension, hyperlipidemia, renal failure                        | Bilateral calcaneal osteomyelitis                                         | Bone biopsy/ Microscan Autoscan 4 System (Siemens Healthcare Diagnostics)    | Bilateral heel ulcerations                          | M | No           | Pip/Taz + Vanco                                     | Clinical Improvement                            |
| 22.                                        | Guinetti-Ortiz et al., 2016 | 48/M | Place of residence                                     | Parkinson disease                                                                      | Osteomyelitis of the right metatarsal bone                                | Bone biopsy/ Automated Vitek-2                                               | Not reported                                        | M | No           | Vanco + Imi; Pip/Taz, Amoclav + Cipro               | Clinical improvement                            |
| <b>Eye infections</b>                      |                             |      |                                                        |                                                                                        |                                                                           |                                                                              |                                                     |   |              |                                                     |                                                 |
| 23.                                        | Butt et al., 1997           | 37/M | Sea water exposure                                     | -                                                                                      | Severe suppurative eye infection with persistent endophthalmitis          | Vitreous fluid/ Not reported                                                 | Eye injury by a fishhook while fishing              | P | Not reported | Genta, Cefa; Pip/Taz+Genta; Cipro                   | Survived, Enucleation                           |
| 24.                                        | Mohan et al., 2014          | 25/M | Fisherman                                              | -                                                                                      | Post-traumatic endophthalmitis                                            | Vitreous sample/ Vitek 2 (BioMerieux, Marcy l'Etoile, France)                | Open globe fishhook injury                          | M | No           | Vanco + Cefta, Gati                                 | Clinical improvement                            |
| <b>Infections associated with dialysis</b> |                             |      |                                                        |                                                                                        |                                                                           |                                                                              |                                                     |   |              |                                                     |                                                 |
| 25.                                        | Bhandari et al., 2020       | 69/M | River water exposure, ESRD/ CAPD, DM, HBD              | Polycystic kidney disease with CAPD, polycystic liver, coronary artery bypass, DM, CCE | CAPD peritonitis associated with complex, multi-loculated splenic abscess | Peritoneal fluid, aspirate of abscess-drainage, blood cultures/ Not reported | Lower leg ulcer or colonization of the PD exit site | P | Yes          | Initially broad-spectrum antibiotics; Cipro + Metro | Survived, recommenced CAPD without complication |

|     |                             |      |                                                      |                                                                                       |                                                              |                                                                              |                   |   |              |                                            |                                    |
|-----|-----------------------------|------|------------------------------------------------------|---------------------------------------------------------------------------------------|--------------------------------------------------------------|------------------------------------------------------------------------------|-------------------|---|--------------|--------------------------------------------|------------------------------------|
| 26. | Yim et al., 2010            | 67/M | Place of residence, ESRD/ CAPD                       | Chronic glomerulonephritis, CAPD-peritonitis in the past                              | Severe sepsis due to CAPD peritonitis, necrotizing fasciitis | Blood cultures, peritoneal fluid/ Not reported                               | Left flank ulcer  | M | Yes          | Cefta + Mero + Vanco + Doxy; Genta + Cefta | Died (MOF)                         |
| 27. | Shrishrimal, 2012           | 78/M | ESRD/ dialysis, PAVD, DM                             | DM, PAVD, multiple amputations, chronic dialysis via a tunneled hemodialysis catheter | Catheter-associated blood stream infection                   | Blood cultures, tip of the hemodialysis catheter/ Not reported               | Not reported      | M | Yes          | Vanco + Cefe; Genta; Genta + Cipro; Mero   | Recovered                          |
| 28. | Chang et al., 2005          | 54/F | Malignancy, ESRD/ CAPD                               | Chronic glomerulonephritis with CAPD, colon cancer with liver metastasis              | CAPD-associated Peritonitis                                  | Dialysate/ Not reported                                                      | Gut translocation | P | No           | Cefa + Tobra                               | Clinical improvement               |
| 29. | Vickers and Ullian, 2011    | 42/F | ESRD/ PD, frequently fishing, place of residence, DM | ESRD with PD by diabetic glomerulosclerosis, DM                                       | Recurrent peritonitis associated with PD                     | PD fluid/ Not reported                                                       | Not reported      | M | Not reported | Cefa + Genta; Genta; Cipro + Genta         | Survived, switched to hemodialysis |
| 30. | López Aperador et al., 2016 | 40/F | ESRD/ PD, exposure to sea water                      | Takayasu-Arteritis, ESRD with PD                                                      | Peritonitis associated with PD                               | Peritoneal fluid/ Not reported                                               | PD-catheter       | P | No           | Cefta + Vanco; Cefta + Cipro + Fluco       | Recovered                          |
| 31. | Chen et al., 1997           | 57/M | Dialysis                                             | Glucophosphate intoxication, acute renal failure                                      | Peritonitis                                                  | Dialysate/ ID 32 GN profile (API system; bioMérieux, Marcy l'Etoile, France) | Not reported      | P | No           | Cefta                                      | Recovered                          |

|                               |                     |      |                                                             |                                                                                                                           |                                                             |                                                                                                                                                                                           |                                       |   |              |                 |                      |
|-------------------------------|---------------------|------|-------------------------------------------------------------|---------------------------------------------------------------------------------------------------------------------------|-------------------------------------------------------------|-------------------------------------------------------------------------------------------------------------------------------------------------------------------------------------------|---------------------------------------|---|--------------|-----------------|----------------------|
| 32.                           | Lee et al., 2016    | 82/F | ESRD/dialysis, malignancy                                   | ESRD, cervical cancer with bladder invasion complicating by bilateral hydronephrosis, complicated urinary tract infection | Febrile (maybe catheter-related) infection                  | Blood cultures (peripheral vessels + intrapermanent catheter)/ Phoenix NID card (Becton Dickinson Diagnostic Systems, Sparks, MD, USA), MALDI-TOF (Bruker Daltonik GmbH, Bremen, Germany) | Catheter-related                      | M | Yes          | Dori            | Recovered            |
| <b>Cerebral infections</b>    |                     |      |                                                             |                                                                                                                           |                                                             |                                                                                                                                                                                           |                                       |   |              |                 |                      |
| 33.                           | Süzüku et al., 2004 | 9/F  | Place of residence                                          | Otitis media 2 years ago, intermittent otorrhoea                                                                          | Chronic otitis media with cerebellar abscess                | Aspirate of the cerebellar abscess/ API 20E system (bioMerieux, France) and VITEK system (bioMerieux, France)                                                                             | Chronic otitis media                  | M | Not reported | Ampi/Sulb       | Recovered            |
| 34.                           | Yilmaz et al., 2007 | 28/M | Poor personal hygiene, trap fisherman, river water exposure | Chronic suppurative otitis media                                                                                          | Cerebral abscess and meningitis                             | CSF, ear exsudate/ Phoenix system (Becton Dickinson)                                                                                                                                      | Chronic otitis media with mastoiditis | P | No           | Mero            | Recovered            |
| 35.                           | Duan et al., 2015   | 63/F | -                                                           | -                                                                                                                         | Intracranial infection after surgery of cerebral hemorrhage | CSF/ 16S rDNA amplification assay                                                                                                                                                         | Not reported                          | M | No           | Tica/Clav + Imi | Recovered            |
| <b>Infective endocarditis</b> |                     |      |                                                             |                                                                                                                           |                                                             |                                                                                                                                                                                           |                                       |   |              |                 |                      |
| 36.                           | Dhawan et al., 1998 | 24/F | -                                                           | Rheumatic heart disease                                                                                                   | Infective endocarditis                                      | Blood cultures/ Biochemical reactions and API 20E system (bioMerieux Vitek, Inc., Hazelwood, Mo.)                                                                                         | Not reported                          | P | Yes          | Genta + Peni    | Clinical improvement |

|                                   |                         |      |                                               |                                                                                                                                                                                                                             |                                                 |                                                                                                  |                                         |   |              |                                              |              |
|-----------------------------------|-------------------------|------|-----------------------------------------------|-----------------------------------------------------------------------------------------------------------------------------------------------------------------------------------------------------------------------------|-------------------------------------------------|--------------------------------------------------------------------------------------------------|-----------------------------------------|---|--------------|----------------------------------------------|--------------|
| 37.                               | Constant et al., 2014   | 40/M | -                                             | Seizure disorder, dislipidemia, tobacco use, asthma, bronchitis, sleep apnea, hypertension, hypothyroidism, osteoarthritis, reight carpal tunnel release surgery, venous insufficiency, thrombosis of the right radial vein | Infective endocarditis                          | Blood cultures/ Vitek 2 automated system (bioMérieux, Durham, NC)                                | Burns wound                             | M | Yes          | Cefa; Cefe + Genta                           | Lost to FU   |
| <b>Intra-abdominal infections</b> |                         |      |                                               |                                                                                                                                                                                                                             |                                                 |                                                                                                  |                                         |   |              |                                              |              |
| 38.                               | Wang et al., 2004       | 61/F | HBD                                           | CCE                                                                                                                                                                                                                         | Febrile diarrhea with polymicrobial bacteremia  | Blood cultures/ Biochemical reactions and semiautomated ATB ID 32 GN method (bioMérieux)         | Shark meat consumption                  | P | Yes          | Cefa + Genta; Cefix + Doxy                   | Recovered    |
| 39.                               | Muñoz et al., 2015      | 60/M | HBD, malnutrition, consumption of crustaceans | Choledocho-lithiasis with biliary pancreatitis, CCE                                                                                                                                                                         | Recurrent pancreatitis with infected pseudocyst | Fluid of infected pancreatic pseudocyst/ Not reported                                            | Not reported                            | P | Not reported | Mero                                         | Not reported |
| 40.                               | Baruah and Grover, 2014 | 50/M | HBD                                           | Alcoholic liver cirrhosis, chronic bidi smoker, alcoholism                                                                                                                                                                  | Peritonitis/ ascitic fluid infection            | Ascitic fluid/ Automated Vitek-2 Compact(C) system version 6.01 (Biomerieux, North Carolina/USA) | Introducing by repeated ascitic tapping | M | No           | Pip/Taz                                      | Recovered    |
| 41.                               | Basir et al., 2012      | 22/F | DM                                            | DM                                                                                                                                                                                                                          | Splenic abscess, pneumonia, septic shock        | Blood cultures/ API 20NE (Biomerieux, Marcy L'Etoile, France)                                    | Not reported                            | M | Yes          | Cefu + Azithro; Mero; Cefta + Amoclav; Cipro | Recovered    |



|                                     |                    |      |                 |                                                                 |                                                                                                |                                                                                         |                 |   |     |                                           |           |
|-------------------------------------|--------------------|------|-----------------|-----------------------------------------------------------------|------------------------------------------------------------------------------------------------|-----------------------------------------------------------------------------------------|-----------------|---|-----|-------------------------------------------|-----------|
| 42.                                 | Chen et al., 1997  | 83/M | HBD, Malignancy | Biliary tract lithiasis, prostate carcinoma                     | Biliary tract infection with hepatic abscess                                                   | Bile/ ID 32 GN profile (API system; bioMérieux, Marcy l'Etoile, France)                 | Not reported    | P | No  | Cefa + Genta + Metro, Cper + Clinda       | Recovered |
| 43.                                 | Chen et al., 1997  | 52/M | HBD             | Biliary tract lithiasis                                         | Biliary tract infection with hepatic abscess                                                   | Bile/ ID 32 GN profile (API system; bioMérieux, Marcy l'Etoile, France)                 | Not reported    | P | No  | Cefa + Genta + Metro                      | Recovered |
| 44.                                 | Chen et al., 1997  | 71/M | HBD             | Biliary tract lithiasis                                         | Biliary tract infection                                                                        | Bile/ ID 32 GN profile (API system; bioMérieux, Marcy l'Etoile, France)                 | Not reported    | P | No  | Cefa + Genta                              | Recovered |
| 45.                                 | Chen et al., 1997  | 81/M | HBD             | Biliary tract lithiasis                                         | Biliary tract infection                                                                        | Bile, Blood cultures/ ID 32 GN profile (API system; bioMérieux, Marcy l'Etoile, France) | Not reported    | P | Yes | Cefa + Genta + Metro                      | Recovered |
| 46.                                 | Bulat et al., 2018 | 27/M | -               | Victim of aggressive blunt trauma with perforation on the ileum | Septic shock with MODS bei general purulent peritonitis and multiple intraperitoneal abscesses | Peritoneal fluid/ Not reported                                                          | GUT perforation | P | No  | Erta + Vanco                              | Recovered |
| 47.                                 | Ali et al., 2017   | 70/M | -               | Chronic constipation, hemorrhoids                               | Subacute intestinal obstruction and appendicitis                                               | Peritoneal fluid/ API® 20E (BioMérieux, Marcy l'Etoile, France)                         | Not reported    | M | No  | Metro + Pip/Taz; Metro + Cipro; Tz + Levo | Recovered |
| <b>Respiratory tract infections</b> |                    |      |                 |                                                                 |                                                                                                |                                                                                         |                 |   |     |                                           |           |
| 48.                                 | Durdu et al., 2012 | 43/F | -               | Brochiectasis, recurrent pneumonias                             | Pneumonia                                                                                      | Sputum/ API 20 NE (BioMerieux, France)                                                  | Not reported    | M | No  | Cipro + Cefta; Ceftr                      | Recovered |

|                               |                     |      |                    |                                                                                                                               |                                 |                                                                                   |                   |   |              |                       |                      |
|-------------------------------|---------------------|------|--------------------|-------------------------------------------------------------------------------------------------------------------------------|---------------------------------|-----------------------------------------------------------------------------------|-------------------|---|--------------|-----------------------|----------------------|
| 49.                           | Jorens et al., 2004 | 65/M | DM                 | Severe polytrauma with pneumothorax, anterior myocardial infarction with cardiogenic shock, CAD, congestive heart failure, DM | Ventilator-associated pneumonia | Bronchus aspirates, BAL/ Not reported                                             | Nasal cavity      | P | No           | Amoclav               | Recovered            |
| 50.                           | Patel et al., 2012  | 63/M | Sea water exposure | NSTEMI, resuscitation                                                                                                         | Pneumonia                       | Endotracheal aspirate/ API 20 NE (BioMérieux)                                     | Respiratory tract | M | No           | Vanco + Pip/Taz; Cefe | Recovered            |
| 51.                           | Liao et al., 2000   | 58/M | Malignancy         | Cavitating, squamous cell carcinoma of the lung                                                                               | Infected cavitating lung tumor  | Aspirate of cavitating lung tumors/ Not reported                                  | Not reported      | P | Not reported | Not reported          | Clinical improvement |
| <b>Bloodstream infections</b> |                     |      |                    |                                                                                                                               |                                 |                                                                                   |                   |   |              |                       |                      |
| 52.                           | Chen et al., 1997   | 51/M | HBD                | Biliary tract lithiasis, chronic hepatitis B                                                                                  | Septicemia                      | Blood cultures/ ID 32 GN profile (API system; bioMérieux, Marcy l'Etoile, France) | Not reported      | P | Yes          | Cefa + Genta + Metro  | Recovered            |
| 53.                           | Chen et al., 1997   | 71/M | HBD                | Biliary tract lithiasis                                                                                                       | Septicemia                      | Blood cultures/ ID 32 GN profile (API system; bioMérieux, Marcy l'Etoile, France) | Not reported      | P | Yes          | Cefa + Genta; Cper    | Recovered            |
| 54.                           | Chen et al., 1997   | 61/M | HBD                | Liver cirrhosis with esophageal varices and gastric varices on endoscopic injection sclerosing therapy                        | Septicemia                      | Blood cultures/ ID 32 GN profile (API system; bioMérieux, Marcy l'Etoile, France) | Not reported      | P | Yes          | Cefa + Genta          | Recovered            |

|     |                            |                  |                           |                                            |                                                                         |                                                                                                |                                    |   |     |                 |           |
|-----|----------------------------|------------------|---------------------------|--------------------------------------------|-------------------------------------------------------------------------|------------------------------------------------------------------------------------------------|------------------------------------|---|-----|-----------------|-----------|
| 55. | Chen et al., 1997          | 71/F             | Malignancy                | Cholangio-carcinoma with liver invasion    | Septicemia                                                              | Blood cultures/ ID 32 GN profile (API system; bioMérieux, Marcy l'Etoile, France)              | Not reported                       | P | Yes | Cefa + Genta    | Died      |
| 56. | Chen et al., 1997          | 85/M             | Malignancy                | Pancreatic carcinoma with liver metastasis | Septicemia                                                              | Blood cultures/ ID 32 GN profile (API system; bioMérieux, Marcy l'Etoile, France)              | Not reported                       | P | Yes | Cefa + Genta    | Died      |
| 57. | Ranjan and Chowdhary, 2017 | 24/M             | -                         | -                                          | Bacteriemia after road traffic accident with head injury and polytrauma | Blood cultures/ Vitek® 2 system (bioMérieux Inc., 100 Rodlph Street, Durham, NC, USA)          | Not reported                       | M | Yes | Pip/Taz + Genta | Died      |
| 58. | Brink et al., 1995         | 18/ Not reported | Poor living standards     | Not reported                               | Sepsis                                                                  | Blood cultures/ Biochemical reactions and API 20NE system (bioMérieux, Marcy l'Etoile, France) | Burn wounds 35% of the body        | P | Yes | Not reported    | Recovered |
| 59. | Brink et al., 1995         | 18/ Not reported | Poor living standards     | Adult respiratory distress syndrom         | Sepsis                                                                  | Blood cultures/ Biochemical reactions and API 20NE system (bioMérieux, Marcy l'Etoile, France) | Burn wounds 50% of the body        | P | Yes | Not reported    | Died      |
| 60. | Brink et al., 1995         | 57/ Not reported | Poor living standards     | Tetanus                                    | Sepsis                                                                  | Blood cultures/ Biochemical reactions and API 20NE system (bioMérieux, Marcy l'Etoile, France) | Traumatic ulcer on lower extremity | M | Yes | Not reported    | Recovered |
| 61. | Brink et al., 1995         | 75/ Not reported | Poor living standards, DM | DM                                         | Bacteremia                                                              | Blood cultures/ Biochemical reactions and API 20NE system (bioMérieux, Marcy l'Etoile, France) | Diabetic ulcer on lower extremity  | M | Yes | Not reported    | Recovered |

|                             |                    |                     |                            |                                                |            |                                                                                                |              |   |     |              |           |
|-----------------------------|--------------------|---------------------|----------------------------|------------------------------------------------|------------|------------------------------------------------------------------------------------------------|--------------|---|-----|--------------|-----------|
| 62.                         | Brink et al., 1995 | 21/ Not reported    | Poor living standards      | Chemical burnwounds on esophagus               | Sepsis     | Blood cultures/ Biochemical reactions and API 20NE system (bioMérieux, Marcy l'Etoile, France) | Not reported | P | Yes | Not reported | Recovered |
| 63.                         | Brink et al., 1995 | 52/ Not reported    | Poor living standards      | Epilepsy, aspiration                           | Bacteremia | Blood cultures/ Biochemical reactions and API 20NE system (bioMérieux, Marcy l'Etoile, France) | Not reported | M | Yes | Not reported | Recovered |
| <b>Pediatric infections</b> |                    |                     |                            |                                                |            |                                                                                                |              |   |     |              |           |
| 64.                         | Brink et al., 1995 | 1 day/ Not reported | Poor living standards, LBW | Respiratory distress, patent ductus arteriosus | Sepsis     | Blood cultures/ Biochemical reactions and API 20NE system (bioMérieux, Marcy l'Etoile, France) | Not reported | P | Yes | Not reported | Died      |
| 65.                         | Brink et al., 1995 | 1 day/ Not reported | Poor living standards, LBW | Respiratory distress, asphyxia neonatorum      | Sepsis     | Blood cultures/ Biochemical reactions and API 20NE system (bioMérieux, Marcy l'Etoile, France) | Not reported | M | Yes | Not reported | Died      |
| 66-68.                      | Brink et al., 1995 | 1 day/ Not reported | Poor living standards, LBW | Respiratory distress, pneumonia                | Bacteremia | Blood cultures/ Biochemical reactions and API 20NE system (bioMérieux, Marcy l'Etoile, France) | Not reported | P | Yes | Not reported | Recovered |
| 69.                         | Brink et al., 1995 | 1 day/ Not reported | Poor living standards, LBW | Respiratory distress, Bochdalek's hernia       | Sepsis     | Blood cultures/ Biochemical reactions and API 20NE system (bioMérieux, Marcy l'Etoile, France) | Not reported | P | Yes | Not reported | Died      |

|        |                    |                         |                            |                                           |            |                                                                                                |              |   |     |              |           |
|--------|--------------------|-------------------------|----------------------------|-------------------------------------------|------------|------------------------------------------------------------------------------------------------|--------------|---|-----|--------------|-----------|
| 70-71. | Brink et al., 1995 | 1 day/ Not reported     | Poor living standards, LBW | Respiratory distress, meconium aspiration | Bacteremia | Blood cultures/ Biochemical reactions and API 20NE system (bioMérieux, Marcy l'Etoile, France) | Not reported | P | Yes | Not reported | Recovered |
| 72.    | Brink et al., 1995 | Premature/ Not reported | Poor living standards, LBW | Respiratory distress, congenital syphilis | Sepsis     | Blood cultures/ Biochemical reactions and API 20NE system (bioMérieux, Marcy l'Etoile, France) | Not reported | M | Yes | Not reported | Died      |
| 73.    | Brink et al., 1995 | Premature/ Not reported | Poor living standards, LBW | Respiratory distress, pneumonia           | Sepsis     | Blood cultures/ Biochemical reactions and API 20NE system (bioMérieux, Marcy l'Etoile, France) | Not reported | P | Yes | Not reported | Died      |
| 74.    | Brink et al., 1995 | Premature/ Not reported | Poor living standards, LBW | Respiratory distress, congenital syphilis | Sepsis     | Blood cultures/ Biochemical reactions and API 20NE system (bioMérieux, Marcy l'Etoile, France) | Not reported | P | Yes | Not reported | Died      |
| 75.    | Brink et al., 1995 | Premature/ Not reported | Poor living standards, LBW | Respiratory distress                      | Bacteremia | Blood cultures/ Biochemical reactions and API 20NE system (bioMérieux, Marcy l'Etoile, France) | Not reported | P | Yes | Not reported | Recovered |
| 76.    | Brink et al., 1995 | Premature/ Not reported | Poor living standards, LBW | Respiratory distress, hydrocephalus       | Bacteremia | Blood cultures/ Biochemical reactions and API 20NE system (bioMérieux, Marcy l'Etoile, France) | Not reported | P | Yes | Not reported | Recovered |
| 77-78. | Brink et al., 1995 | Premature/ Not reported | Poor living standards, LBW | Respiratory distress                      | Bacteremia | Blood cultures/ Biochemical reactions and API 20NE system (bioMérieux, Marcy l'Etoile, France) | Not reported | M | Yes | Not reported | Recovered |

|     |                    |                         |                            |                                                 |            |                                                                                                |                             |   |     |              |           |
|-----|--------------------|-------------------------|----------------------------|-------------------------------------------------|------------|------------------------------------------------------------------------------------------------|-----------------------------|---|-----|--------------|-----------|
| 79. | Brink et al., 1995 | Premature/ Not reported | Poor living standards, LBW | Respiratory distress, congenital laryngeal cyst | Bacteremia | Blood cultures/ Biochemical reactions and API 20NE system (bioMérieux, Marcy l'Etoile, France) | Not reported                | M | Yes | Not reported | Recovered |
| 80. | Brink et al., 1995 | 6 months/ Not reported  | Poor living standards, LBW | Recurrent broncho-pneumonia                     | Sepsis     | Blood cultures/ Biochemical reactions and API 20NE system (bioMérieux, Marcy l'Etoile, France) | Not reported                | M | Yes | Not reported | Recovered |
| 81. | Brink et al., 1995 | 12 months/ Not reported | Poor living standards, LBW | Broncho-pneumonia                               | Bacteremia | Blood cultures/ Biochemical reactions and API 20NE system (bioMérieux, Marcy l'Etoile, France) | Not reported                | P | Yes | Not reported | Recovered |
| 82. | Brink et al., 1995 | 12 months/ Not reported | Poor living standards, LBW | Broncho-pneumonia                               | Bacteremia | Blood cultures/ Biochemical reactions and API 20NE system (bioMérieux, Marcy l'Etoile, France) | Not reported                | M | Yes | Not reported | Recovered |
| 83. | Brink et al., 1995 | 16/ Not reported        | Poor living standards      | Not reported                                    | Sepsis     | Blood cultures/ Biochemical reactions and API 20NE system (bioMérieux, Marcy l'Etoile, France) | Burn wounds 35% of the body | P | Yes | Not reported | Recovered |
| 84. | Brink et al., 1995 | 17/F                    | Poor living standards, HBD | Cholangitis, liver abscess, liver failure       | Sepsis     | Blood cultures/ Biochemical reactions and API 20NE system (bioMérieux, Marcy l'Etoile, France) | Not reported                | P | Yes | Not reported | Died      |

| Others |                       |      |     |                                                                                                    |                                                                             |                                                                                                                   |                                        |   |     |                             |           |
|--------|-----------------------|------|-----|----------------------------------------------------------------------------------------------------|-----------------------------------------------------------------------------|-------------------------------------------------------------------------------------------------------------------|----------------------------------------|---|-----|-----------------------------|-----------|
| 85.    | Benaissa et al., 2021 | 66/M | -   | Hypertension, benign prostate hypertrophy, smoking, CAD/ myocardial infarction                     | Septic shock and retroperitoneal hematoma secondary to coronary angiography | Blood cultures/ API 20NE@ gallery (Bio- Mérieux, Marcy l'étoile France) and biochemical and bacteriological tests | Catheter used for coronary angiography | M | Yes | Ceftr + Cipro; Tige + Amika | Recovered |
| 86.    | Chen et al., 1997     | 71/M | -   | Obstructed nasolacrimal duct                                                                       | Dacryocystitis                                                              | Pus/ ID 32 GN profile (API system; bioMérieux, Marcy l'Etoile, France)                                            | Not reported                           | P | No  | Clex                        | Recovered |
| 87.    | Chen et al., 1997     | 63/M | HBD | Biliary tract lithiasis; biliary tract infection with pancreatic abscess, pneumonia, schizophrenia | Pleural empyema, sepsis                                                     | Pleural effusion/ ID 32 GN profile (API system; bioMérieux, Marcy l'Etoile, France)                               | Not reported                           | P | No  | Cefa + Genta; Cper + Genta  | Died      |

Vanco= Vancomycin, Imi= Imipenem, Pip/Taz= Piperacillin/Tazobactam, Amoclav= Amoxicillin/Clavulanic acid, Clav= Clavulanic acid, Cipro= Ciprofloxacin, Cefa= Cefazoline, Ceftr= Ceftriaxone, Amp/Sulb= Ampicillin/Sulbactam, Metro= Metronidazole, Amp= Ampicillin, Peni= Penicillin, Cefix= Cefixime, Mero= Meropenem, Cefta= Ceftazidime, Fluclox= Flucloxacillin, Tobra= Tobramycin, Cefe= Cefepime, Fluco= Fluconazole, Cefu= Cefuroxime, Azithro= Azithromycin, Tige= Tigecyclin, Amika= Amikacin, Gati= Gatifloxacin, Levo= Levofloxacin, Pip= Piperacillin, Clex= Cephalexin, Cper= Cefoperazone, Erta= Ertapenem, Ctax= Cefotaxime, Dori= Doripenem, Tz= Tazozin, Tica= Ticarcillin, Line= Linezolid

PD= Peritoneal dialysis, DM= Diabetes mellitus, CAPD= Continuous ambulatory peritoneal dialysis, CCE= Cholecystectomy, MOF= Multi-organ-failure, ESRD= End-stage renal disease, BAL= Bronchoalveolar lavage, FU= Follow up, HBD= Hepato-biliary disorder, COPD= Chronic obstructive pulmonary disease, Tx= Transplantation, CMV= Cytomegalovirus CSF= Cerebrospinal fluid, CAD= Coronary artery disease, MODS= Multi-organ-dysfunction-syndrom, GE= Gastrectomy, ACS= Acute coronary syndrom, DIC= Disseminated intravascular coagulation, LBW= Low birth weight

Ali, A. M., Noorulamin, M., and Arif, S. (2017). Isolation of *Shewanella putrefaciens* in an elderly man with subacute intestinal obstruction & appendicitis. *IDCases*. 9, 45–46. doi: 10.1016/j.idcr.2017.06.001

Bulat, O., Bulat, C., Blaj, M., Lupusoru, I., and Scripcariu, V. (2018). A Rare Colonization in Peritoneum After Blunt Abdominal Trauma: *S. putrefaciens* and *S. cerevisiae*. *Balkan Med. J.* 35 (4), 333–335. doi: 10.4274/balkanmedj.2017.0773

Jorens, P. G., Goovaerts, K., and Ieven, M. (2004). *Shewanella putrefaciens* isolated in a case of ventilator-associated pneumonia. *Respiration*. 71 (2), 199–201. doi: 10.1159/000076686

Liao, W. Y., Liaw, Y. S., Wang, H. C., Chen, K. Y., Luh, K. T., and Yang, P. C. (2000). Bacteriology of infected cavitating lung tumor. *Am. J. Respir. Crit. Care Med.* 161 (5), 1750–1753. doi: 10.1164/ajrccm.161.5.9905103

Ranjan, R., and Chowdhary, P. (2017). A rare case of *Shewanella putrefaciens* bacteremia in a patient of road traffic accident. *Indian J. Pathol. Microbiol.* 60 (4), 599–600. doi: 10.4103/IJPM.IJPM\_254\_16

Wang, I. K., Lee, M. H., Chen, Y. M., and Huang, C. C. (2004). Polymicrobial bacteremia caused by *Escherichia Coli*, *Edwardsiella Tarda*, and *Shewanella putrefaciens*. *Chang Gung Med. J.* 27 (9), 701–705.
